# Supplementary material
Source: Springer Nature journal article supplement (https://www.springermedizin.de/resource/supplementary/12958_2010_771_MOESM4_ESM.pdf/9568460)

### 1<sup>st</sup> Transplant

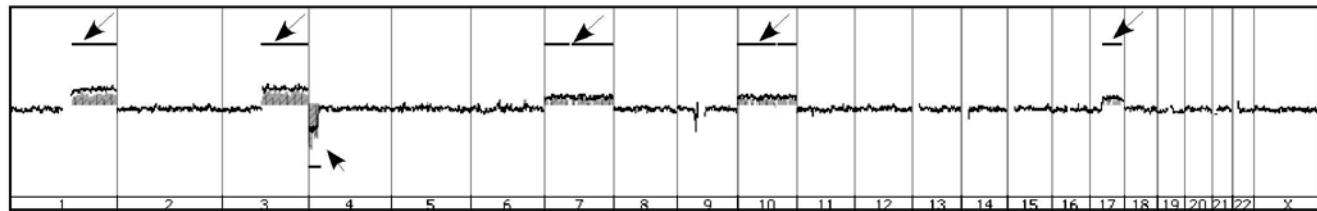

### 3<sup>rd</sup> Transplant

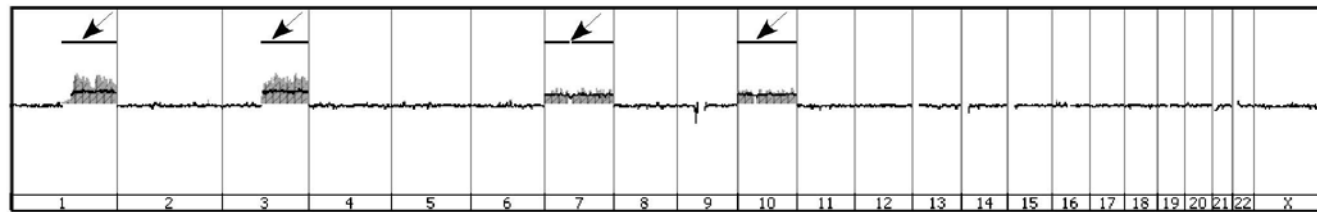

### 6<sup>th</sup> Transplant

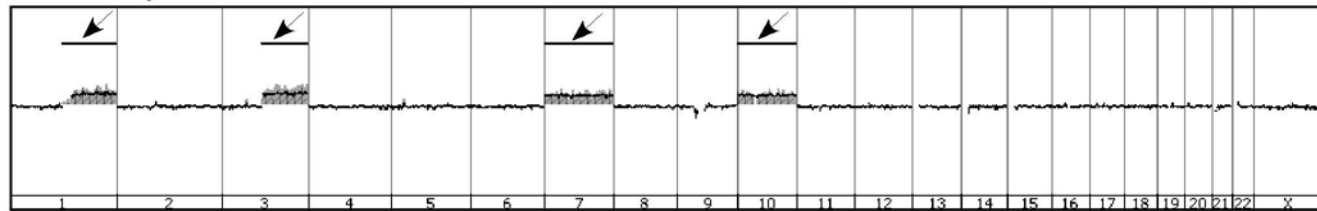

Distance along the genome

Supplement: MOESM4 [file 9568460]
